# Supplementary material for: Multimorbidity and chronic diseases among undocumented migrants: evidence to contradict the myths
Source: Springer Nature journal article supplement (doi:10.1186/s12939-020-01225-0), 2020-07-06
Supplement: MOESM1 [file 18151336]

**Supplementary table 1- distribution of the migrant population according to geographic area of origin.**

|                               | <b>DM</b>     | <b>UM</b>    | <b>Total</b>  |
|-------------------------------|---------------|--------------|---------------|
| <b>Africa</b>                 | <b>29.643</b> | <b>2.563</b> | <b>32.206</b> |
| Morocco                       | 14.683        | 977          | 15.660        |
| Algeria                       | 3.716         | 433          | 4.149         |
| Senegal                       | 2.749         | 223          | 2.972         |
| Gambia                        | 1.674         | 84           | 1.758         |
| Ghana                         | 1.502         | 145          | 1.647         |
| Mali                          | 1.192         | 91           | 1.283         |
| Equatorial Guinea             | 935           | 151          | 1.086         |
| Guinea                        | 612           | 68           | 680           |
| Nigeria                       | 568           | 93           | 661           |
| Cape Verde                    | 419           | 33           | 452           |
| Mauritania                    | 378           | 42           | 420           |
| Cameroon                      | 178           | 19           | 197           |
| Egypt                         | 135           | 28           | 163           |
| Guinea-Bissau                 | 119           | 38           | 157           |
| Angola                        | 74            | 23           | 97            |
| Burkina Faso                  | 85            | 8            | 93            |
| Ivory Coast                   | 77            | 16           | 93            |
| Tunisia                       | 71            | 10           | 81            |
| Republic of the Congo         | 63            | 12           | 75            |
| Western Sahara                | 66            | 1            | 67            |
| Congo, Democratic Republic of | 41            | 7            | 48            |
| Niger                         | 35            | 4            | 39            |
| Sierra Leone                  | 19            | 20           | 39            |
| Liberia                       | 29            | 6            | 35            |
| Togo                          | 28            | 5            | 33            |
| South African Republic        | 29            | 1            | 30            |
| Kenya                         | 25            | 5            | 30            |
| Mozambique                    | 16            | 5            | 21            |
| Gabon                         | 16            | 1            | 17            |
| Sudan                         | 14            | 0            | 14            |
| Mauritius                     | 11            | 0            | 11            |
| Benin                         | 10            | 1            | 11            |
| Central African Republic      | 10            | 0            | 10            |
| Rwanda                        | 10            | 0            | 10            |
| Other countries               | 54            | 13           | 67            |

|                        |               |              |               |
|------------------------|---------------|--------------|---------------|
| <b>Asia</b>            | <b>4.621</b>  | <b>327</b>   | <b>4.948</b>  |
| China                  | 2.971         | 203          | 3.174         |
| Pakistan               | 753           | 30           | 783           |
| Syria                  | 127           | 6            | 133           |
| Armenia                | 97            | 7            | 104           |
| India                  | 78            | 24           | 102           |
| Jordan                 | 80            | 5            | 85            |
| Lebanon                | 64            | 1            | 65            |
| Philippines            | 55            | 3            | 58            |
| Turkey                 | 49            | 7            | 56            |
| Bangladesh             | 48            | 0            | 48            |
| Japan                  | 35            | 12           | 47            |
| Iran                   | 28            | 5            | 33            |
| Thailand               | 21            | 3            | 24            |
| Laos                   | 21            | 0            | 21            |
| Israel                 | 19            | 2            | 21            |
| Korea, South           | 19            | 0            | 19            |
| Korea, North           | 15            | 4            | 19            |
| Kazakhstan             | 14            | 3            | 17            |
| Uzbekistan             | 14            | 2            | 16            |
| USSR                   | 10            | 4            | 14            |
| Indonesia              | 9             | 1            | 10            |
| Other countries        | 94            | 5            | 99            |
| <b>Eastern Europe</b>  | <b>39.678</b> | <b>7.429</b> | <b>47.107</b> |
| Romania                | 31.760        | 5.374        | 37.134        |
| Bulgaria               | 3.010         | 451          | 3.461         |
| Poland                 | 1.714         | 1.089        | 2.803         |
| Ukraine                | 1.644         | 201          | 1.845         |
| Russia                 | 581           | 69           | 650           |
| Moldova                | 266           | 38           | 304           |
| Lithuania              | 227           | 59           | 286           |
| Slovakia               | 87            | 60           | 147           |
| Slovakia               | 70            | 11           | 81            |
| Hungary                | 61            | 27           | 88            |
| Albania                | 51            | 12           | 63            |
| Bosnia and Herzegovina | 45            | 4            | 49            |
| Georgia                | 43            | 11           | 54            |
| Latvia                 | 32            | 7            | 39            |
| Yugoslavia             | 31            | 2            | 33            |
| Croatia                | 17            | 6            | 23            |
| Serbia                 | 14            | 2            | 16            |

|                                           |               |              |               |
|-------------------------------------------|---------------|--------------|---------------|
| Slovenia                                  | 10            | 5            | 15            |
| Other countries                           | 15            | 1            | 16            |
| <b>Latin America</b>                      | <b>39.829</b> | <b>4.643</b> | <b>44.472</b> |
| Ecuador                                   | 11.465        | 1.583        | 13.048        |
| Colombia                                  | 7.823         | 1.017        | 8.840         |
| Dominican Republic                        | 2.968         | 134          | 3.102         |
| Argentina                                 | 2.825         | 411          | 3.236         |
| Peru                                      | 2.821         | 280          | 3.101         |
| Nicaragua                                 | 2.501         | 132          | 2.633         |
| Brazil                                    | 1.850         | 331          | 2.181         |
| Cuba                                      | 1.787         | 123          | 1.910         |
| Venezuela                                 | 1.262         | 116          | 1.378         |
| Bolivia                                   | 950           | 121          | 1.071         |
| Chile                                     | 916           | 119          | 1.035         |
| Uruguay                                   | 688           | 61           | 749           |
| Honduras                                  | 652           | 42           | 694           |
| Mexico                                    | 467           | 111          | 578           |
| Paraguay                                  | 295           | 39           | 334           |
| El Salvador                               | 227           | 6            | 233           |
| Guatemala                                 | 91            | 4            | 95            |
| Panama                                    | 84            | 5            | 89            |
| Costa Rica                                | 51            | 1            | 52            |
| Dominica                                  | 48            | 4            | 52            |
| Puerto Rico                               | 42            | 1            | 43            |
| Other countries                           | 16            | 2            | 18            |
| <b>Western Europe &amp; North America</b> | <b>9.661</b>  | <b>2.190</b> | <b>11.851</b> |
| France                                    | 3.302         | 252          | 3.554         |
| Portugal                                  | 1.995         | 1.292        | 3.287         |
| Germany                                   | 1.178         | 113          | 1.291         |
| Italy                                     | 661           | 204          | 865           |
| Switzerland                               | 568           | 17           | 585           |
| United Kingdom                            | 561           | 97           | 658           |
| United States                             | 371           | 27           | 398           |
| Belgium                                   | 250           | 31           | 281           |
| Netherlands                               | 239           | 45           | 284           |
| Czech Republic                            | 87            | 42           | 129           |
| Canada                                    | 82            | 6            | 88            |
| Andorra                                   | 65            | 2            | 67            |
| Australia                                 | 61            | 1            | 62            |
| Ireland                                   | 50            | 15           | 65            |
| Denmark                                   | 38            | 3            | 41            |
| Sweden                                    | 36            | 15           | 51            |

|                 |    |    |    |
|-----------------|----|----|----|
| Austria         | 32 | 4  | 36 |
| Greece          | 28 | 12 | 40 |
| Finland         | 19 | 3  | 22 |
| Norway          | 14 | 4  | 18 |
| Other countries | 24 | 5  | 29 |

---

DM: documented migrants; UM: undocumented migrants
